# Supplementary material for: Responses of Polyamine-Metabolic Genes to Polyamines and Plant Stress Hormones in Arabidopsis Seedlings
Source: MDPI journal article supplement (doi:10.3390/cells10123283), 2021-11-24
Supplement: s1 [file s1]

**Table S1.** Primer sequences used for qRT-PCR.

| Gene name                             | Gene ID   | Primer sequence                |                               |
|---------------------------------------|-----------|--------------------------------|-------------------------------|
|                                       |           | Forward primer                 | Reverse primer                |
| <i>ACT8</i>                           | AT1G49240 | 5'-GTGAGCCAGATCTTCATTCGTC-3'   | 5'-TCTCTTGCTCGTAGTCGACAG-3'   |
| <i>UBQ10</i>                          | AT4G05320 | 5'-CACACTCCACTTGGTCTTGC-3'     | 5'-AAGATCAACCTCTGCTGGTC-3'    |
| <i>ADC1</i>                           | AT2G16500 | 5'-CCCATCGATACCTTTTCCAG-3'     | 5'-AAACCACTCGGATCTGTAAC-3'    |
| <i>ADC2</i>                           | AT4G34710 | 5'-CCGCCGGTGATGTTTTATC-3'      | 5'-CAATCCTAAACCACCGGAAG-3'    |
| <i>ARGAH1</i>                         | AT4G08900 | 5'-CTTTTACAGGTTGGGATCAG-3'     | 5'-CCTGAAGGTTGTGTAAGATG-3'    |
| <i>ARGAH2</i>                         | AT4G08870 | 5'-AAATGTTGGAAGAACTTGAACTAG-3' | 5'-AAACTTAGCCGCGACCATTG-3'    |
| <i>AIH</i>                            | AT5G08170 | 5'-TTCCTCATCACTCGGTTGTG-3'     | 5'-TTAATGAACGGCTCTCGTTC-3'    |
| <i>CPA</i>                            | AT2G27450 | 5'-CTTCATTGCCGGACCAACAG-3'     | 5'-TAATGGATTTCGCCAGTGTG-3'    |
| <i>SPDS1</i>                          | AT1G23820 | 5'-CATTTCTCGGAGATATTCACCAG-3'  | 5'-TCCATATGTTGCAGACTGGA-3'    |
| <i>SPDS2</i>                          | AT1G70310 | 5'-GTCTCTCTTCTTCAATCCATG-3'    | 5'-TCCATATGTTGCAGACTGGA-3'    |
| <i>SPMS</i>                           | AT5G53120 | 5'-ACATATCCAAGCGGCGTGAT-3'     | 5'-CCTCTTCAAGAGTTCTACAAAG-3'  |
| <i>ACL5</i>                           | AT5G19530 | 5'-ACCGTTAACCAGCGATGCTT T-3'   | 5'-CCGTAACTCTCTCTTTGATTTC-3'  |
| <i>SAMDC1</i>                         | AT3G02470 | 5'-GGTTTCTGGAACAAGGAGT-3'      | 5'-TCTTGAGCAGTTTGAGTAG-3'     |
| <i>SAMDC2</i>                         | AT5G15950 | 5'-TCCTCTACATAAAAAGCGTG-3'     | 5'-GGAACCAGAGCTTTGAGAAA-3'    |
| <i>SAMDC3</i>                         | AT3G25570 | 5'-CTGCTTACTCAAACATCACTG-3'    | 5'-GAACGAAGACTCTTTCCTTG-3'    |
| <i>SAMDC4/BUD2</i>                    | AT5G18930 | 5'-CGAAGATATCTCTGAGGTGT-3'     | 5'-CTCCTTTTTTACTCCTCCGG-3'    |
| <i>PAO1</i>                           | AT5G13700 | 5'-TGGTCAAGTAGCTGAAGAAG-3'     | 5'-CCCTAACTACCTGGTTTAGT-3'    |
| <i>PAO2</i>                           | AT2G43020 | 5'-TAGGCCACAGGGTTACTAAG-3'     | 5'-ACTCTACTTTCCGCCAAAAG-3'    |
| <i>PAO3</i>                           | AT3G59050 | 5'-GTTGGGATCAGGAAGAACTG-3'     | 5'-TGGAAGCTTTGGTTTCAATG-3'    |
| <i>PAO4</i>                           | AT1G65840 | 5'-GAACCATAGGGTTACTAAAG-3'     | 5'-CCCGAGGAAGTCCACATTAG-3'    |
| <i>PAO5</i>                           | AT4G29720 | 5'-ACAACACCGACAAGGAGATT-3'     | 5'-CCAGTCTCTTTAGCGATTCT-3'    |
| <i>CuAO<math>\alpha</math>1/CuAO5</i> | AT1G31670 | 5'-GTTTGGTCCCAAAGGAATAG-3'     | 5'-GTTCTGGCAGTGCACGTTG-3'     |
| <i>CuAO<math>\alpha</math>2/CuAO8</i> | AT1G31690 | 5'-GCTTGAGAGCGGAGGAGTTG-3'     | 5'-TTCTCTATTTCCCTATCTCTTTG-3' |
| <i>CuAO<math>\alpha</math>3/CuAO2</i> | AT1G31710 | 5'-GTGTGGTCTCAAAGGAATAG-3'     | 5'-TTACAGTCCATCATCAAGTAG-3'   |
| <i>CuAO<math>\beta</math>/ATAO1</i>   | AT4G14940 | 5'-GTATGGAGTAGTAGGAACAG-3'     | 5'-GTTTGACGTAACATAAGTCAATC-3' |
| <i>CuAO<math>\gamma</math>1/CuAO1</i> | AT1G62810 | 5'-GTCAGACCGGGACCGTTC-3'       | 5'-GGATATTTGATCTTCTCTACTTG-3' |
| <i>CuAO<math>\gamma</math>2/CuAO7</i> | AT3G43670 | 5'-AGTTTGGTCCGACAGAGATC-3'     | 5'-GCACAGTGTCGAATAAGATG-3'    |
| <i>CuAO<math>\delta</math>/CuAO4</i>  | AT4G12270 | 5'-ATCACCGGTATACCGATAAG-3'     | 5'-AAAGTGACGTAGTGATCGTG-3'    |
| <i>CuAO<math>\zeta</math>/CuAO3</i>   | AT2G42490 | 5'-GTTTCACACTAATGCCACATG-3'    | 5'-AGTCTTGCAAACACACACAC-3'    |
